# Supplementary material
Source: publisher figshare collection journal article supplement (https://gsapubs.figshare.com/ndownloader/files/25302140)
Supplement: Supplementary file 1 [file 25302140]

## Sheet: Cores and sections
Table S1 - Key to old and new labels for cores and sampling locations located on Figures S1A-S1I
Label on	Label on Figs.	Shown		Core on transect	1992-2017	Area	Date	Depth (cm)
Fig. 4	S1A-S1I	on Figs.*		on Fig. 4	transects		described	reached
not present	2	H			A	Deming Creek, South Inlet	1987-07-18	550
not present	1	H			A	Deming Creek, South Inlet	1987-07-18	670
not present	10	H			A	Deming Creek, South Inlet	1988-08-11	299
not present	9	3, H			A	Deming Creek, South Inlet	1987-09-22	802
not present	12	3, H			A	Deming Creek, South Inlet	1990-04-27	361
not present	11	3, H			A	Deming Creek, South Inlet	1988-08-11	330
not present	6	H			B	Deming Creek, South Inlet	1987-09-22	279
not present	7	H			B	Deming Creek, South Inlet	1987-09-22	267
not present	8	H			B	Deming Creek, South Inlet	1987-09-22	708
none	3	H				opposite South Inlet	1987-09-19	388
1	C-I	C, D		A	C	central Cox Island	2005-06-05
2	CI-03	C, D		A	C	central Cox Island	1990-06-17	556
3	C-II	C, D		A	C	central Cox Island	2005-06-05
4	C-III	C, D		A	C	central Cox Island	2005-06-05
5	C-IV			A	C	central Cox Island	2005-06-05
6	CI-04			A	C	central Cox Island	1990-06-17	590
7	CI-05			A	C	central Cox Island	1990-06-17	549
8	CI-06			A	C	central Cox Island	1990-06-17	502
9	CI-11			A	C	central Cox Island	1990-06-17	445
unlabled	CI-02(SU-05)				C	central Cox Island	1987-09-19	586
unlabled	CI-10				C	central Cox Island	1990-06-18	467
unlabled	CI-09				C	central Cox Island	1990-06-18	301
unlabled	CI-08				C	central Cox Island	1990-06-18	257
unlabled	CI-07				C	central Cox Island	1990-06-18	282
19	SU=04	A		C		eastern Cox Island	1987-09-19	695
unlabled	CI-12				outcrop	North of Cox Island	1990-06-18	377
unlabled	1-1	A, D			D	northeast Cox Island	2007-06-01	300
	1-2	A			D	northeast Cox Island	2007-06-01	300
	1-3	A			D	northeast Cox Island	2007-06-01	300
	1-4	A, D			D	northeast Cox Island	2007-06-01	300
	2-1	A			E	northeast Cox Island	2007-06-02	200
	2-2	A				northeast Cox Island	2007-06-02	200
	2-3	A			E	northeast Cox Island	2007-06-02	200
	2-4	A			E	northeast Cox Island	2007-06-02	200
	2-5	A			E	northeast Cox Island	2007-06-02	300
	2-6	A			D E	northeast Cox Island	2007-06-02	300
	2-7	A			D	northeast Cox Island	2007-06-02	300
11	2-8 (Kirby)	A, D		B C	D F	northeast Cox Island	2007-06-03	456
	2-9	A, D			D	northeast Cox Island	2007-06-02	300
20	2-10	B, E, F			E F	northeast Cox Island	2007-06-02	255
	2-11	B, E, F			E	northeast Cox Island	2007-06-02	250
	2-12	A			E	northeast Cox Island	2007-06-02	300
	3-1				F	northeast Cox Island	2007-06-03	300
	3-2	A, D			F	northeast Cox Island	2007-06-03	300
	3-3	A			D	northeast Cox Island	2007-06-03	300
K	Kirby A&B	A, D		B C	F	northeast Cox Island	2007-06-04
S	Seal A&B	A, D		B		northeast Cox Island	2007-06-04
12	C IV (Seal)	A, D		B	D	northeast Cox Island	2007-06-03	360
10	C V	A, D		B	D	northeast Cox Island	2007-06-03	400
Outcrop 1	Bank Section	A, D		C	D F	northeast Cox Island	2008-05-05	210+
Outcrop 2	NA			B	D	river bank east of Cox Island	2008-05-08	220
13	CI08-1	A, D		C		northeast Cox Island	2008-05-05	386
14	CI08-2 (Sec 1)	A, D		C		northeast Cox Island	2008-05-05	199
	CI08-3					northeast Cox Island	2008-05-05	300
15	CI08-4			C	F	northeast Cox Island	2008-05-05	390
18	CI08-5			C	F	northeast Cox Island	2008-05-06	363
17	CI08-6			C	F	northeast Cox Island	2008-05-06	290
16	CI08-7			C	F	northeast Cox Island	2008-05-07	500
not present	1	I			G	North Fork of Siuslaw River	1990-06-15	406
not present	2	I			G	North Fork of Siuslaw River	1990-06-16	405
not present	3	I			G	North Fork of Siuslaw River	1990-06-16	192
not present	4	I			G	North Fork of Siuslaw River	1990-06-16	451
not present	5	I			G	North Fork of Siuslaw River	1990-06-16	290
not present	6	I			G	North Fork of Siuslaw River	1990-06-16	243
not present	7	I			G	North Fork of Siuslaw River	1990-06-16	450
not present	8	I			G	North Fork of Siuslaw River	1990-06-16	450
*Unlabeled cores on Figs. 2 and 4 are labeled on the indicated panels of Figs. S1A-S1I
69 cores and outcrops examined; 38 cores described; 3 outcrops described and photographed
4 vibracores described and sampled in lab from sites S and K
